# Supplementary material for: B-TUD-1: a versatile mesoporous catalyst
Source: Royal Society of Chemistry journal article supplement (doi:10.1039/c3ra44406f), 2013-01-01

## Electronic Supporting Information

### B-TUD-1: A versatile mesoporous catalyst

5 Adeline Ranoux, Kristina Djanashvili, Isabel W. C. E. Arends and Ulf Hanefeld\*

Figure S1  $^{27}\text{Al}$  MAS NMR spectra of the Al-TUD-1 25 material

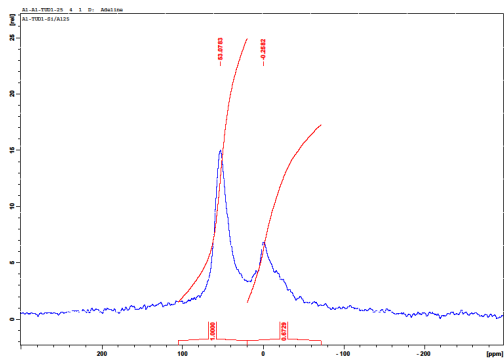

10

Figure S2  $^{11}\text{B}$  MAS NMR spectra of the B-TUD-1 10 material (top) and B-TUD-1 25 material (bottom) after HMF reaction and calcination

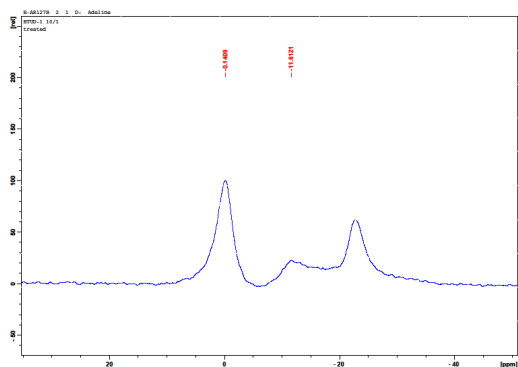

15

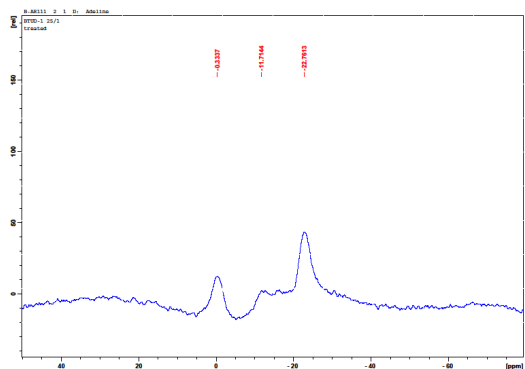

Supplement: c3ra44406f.pdf [file c3ra44406f.pdf]
